# Supplementary material for: Short-channel mesoporous SBA-15 silica modified by aluminum grafting as a support for CoRu Fischer–Tropsch synthesis catalysts
Source: Royal Society of Chemistry journal article supplement (doi:10.1039/d0cy02418j), 2021-01-01

## Supporting Information

for

### **Short-channel mesoporous SBA-15 silica modified by aluminum grafting as support for CoRu Fischer-Tropsch synthesis catalysts**

Sophia Mohammadnasabomran,<sup>a</sup> Carlos Márquez-Álvarez,<sup>b</sup> Joaquín Pérez-Pariente,<sup>\*b</sup> and Agustín Martínez <sup>\*c</sup>

<sup>a</sup> School of Chemistry, College of Science, University of Tehran, Tehran, Iran.

<sup>b</sup> Instituto de Catálisis y Petroleoquímica, ICP-CSIC, C/Marie Curie 2, 28049, Madrid, Spain.

<sup>c</sup> Instituto de Tecnología Química, Universitat Politècnica de València – Consejo Superior de Investigaciones Científicas (UPV – CSIC), Avda. de los Naranjos s/n, 46022 Valencia, Spain.

\* Corresponding authors: [jperez@icp.csic.es](mailto:jperez@icp.csic.es) (J. Pérez-Pariente); [amart@itq.upv.es](mailto:amart@itq.upv.es) (A. Martínez).

## Estimation of the contribution of Ru<sup>0</sup> species to the overall FTS activity of CRLPS and CRALPS catalysts

The following assumptions were made to estimate the contribution of active Ru<sup>0</sup> species to the overall FTS activity of CRLPS and CRALPS catalysts:

- a) Both Ru<sup>0</sup> and Co<sup>0</sup> active sites exhibit the same TOF [1].
- b) The dispersion of Ru<sup>0</sup> species is 100%, which would correspond to the extreme situation where the contribution of Ru<sup>0</sup> sites would be maximal.

Taking into account the above assumptions, the contribution of surface Ru<sup>0</sup> species to the overall activity of our Ru-promoted Co catalysts could be estimated by simply considering the concentrations of accessible Co<sup>0</sup> and Ru<sup>0</sup> sites. Since we only know the total concentration of surface metal (Co<sup>0</sup>+Ru<sup>0</sup>) sites from the total H<sub>2</sub> uptake determined by H<sub>2</sub> chemisorption (Table 3), we can determine the H<sub>2</sub> uptake associated to Ru by considering 100% dispersion of Ru<sup>0</sup> species. After subtracting this value from the total H<sub>2</sub> uptake, we can then recalculate the Co dispersion (D(Co)) assuming a chemisorption stoichiometry H:metal = 1:1 for both Co<sup>0</sup> and Ru<sup>0</sup>. Thus, the concentration of surface Co<sup>0</sup> and Ru<sup>0</sup> sites can be determined from the metal contents (measured by ICP-OES) and metal dispersions, from which the % contribution of Ru<sup>0</sup> sites to the total FTS activity (FT<sub>Ru</sub>) can be directly estimated as:

$$FT_{Ru} (\%) = [Ru^0]_s / ([Co^0]_s + [Ru^0]_s) \cdot 100$$

where [Co<sup>0</sup>]<sub>s</sub> and [Ru<sup>0</sup>]<sub>s</sub> are the concentrations of surface Co<sup>0</sup> and Ru<sup>0</sup> sites, respectively.

The results of such calculations are compiled in Table S1 for our CRLPS and CRALPS catalysts.

Table S1. Estimation of the contribution of Ru<sup>0</sup> sites to the total FTS activity (FT<sub>Ru</sub>) of CRLPA and CRALPS catalysts.

| Catalyst | Co (wt%) | Ru (wt%) | H <sub>2</sub> uptake (μmol/g <sub>cat</sub> ) |      | D(Co) (%) | [Co <sup>0</sup> ] <sub>s</sub> (μmol/g <sub>cat</sub> ) | [Ru <sup>0</sup> ] <sub>s</sub> (μmol/g <sub>cat</sub> ) | FT <sub>Ru</sub> (%) |            |
|----------|----------|----------|------------------------------------------------|------|-----------|----------------------------------------------------------|----------------------------------------------------------|----------------------|------------|
|          |          |          | Total                                          | Ru   |           |                                                          |                                                          |                      | Co         |
| CRLPS    | 17.1     | 0.3      | 156                                            | 14.8 | 141.2     | 9.7                                                      | 282.3                                                    | 29.7                 | <b>9.5</b> |
| CRALPS   | 16.5     | 0.2      | 192                                            | 9.9  | 182.1     | 13.0                                                     | 364.2                                                    | 19.8                 | <b>5.2</b> |

[1] E. Iglesia, S.L. Soled, R.A. Fiato, J. Catal. 137 (1992) 212.

**Figure S1.** Evolution of the CO conversion with time-on-stream (TOS) during period 1 (constant GHSV) and period 2 (constant CO conversion) for CRLPS and CRALPS catalysts. Reaction conditions: 220 °C, 2.0 MPa, H<sub>2</sub>/CO molar ratio of 2.

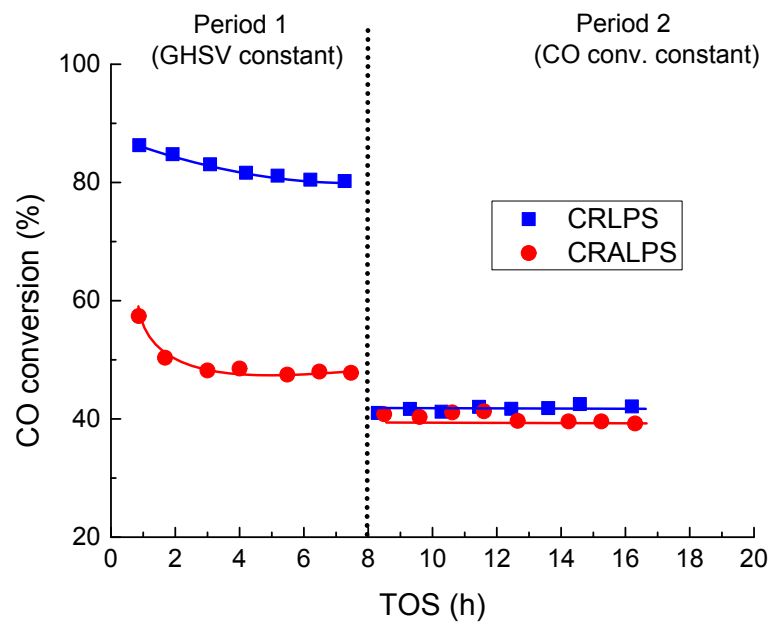

**Figure S2.** ASF distributions for CRLPS and CRALPS catalysts at constant CO conversion of ca. 40% (period 2). Reaction conditions: 220 °C, 2.0 MPa, and H<sub>2</sub>/CO = 2.

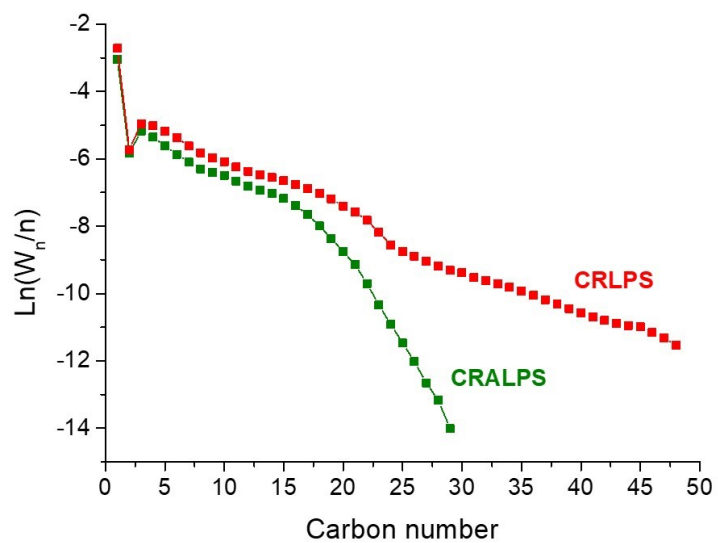

Supplement: d0cy02418j1.pdf [file d0cy02418j1.pdf]
